# 1     **Scrutiny of human lung infection by SARS-CoV-2 and associated human immune** 2     **responses in humanized mice**

3     Zheng Hu<sup>1,#</sup>, Renren Sun<sup>1,#</sup>, Zongzheng Zhao<sup>3,#</sup>, Cong Fu<sup>1</sup>, Yixin Wang<sup>1,4</sup>, Zhendong  
4     Chunmao Zhang<sup>3</sup>, Lina Liu<sup>8</sup>, Cheng Zhang<sup>5</sup>, Chang Shu<sup>1</sup>, Jin He<sup>1</sup>, Wei Li<sup>2,6</sup>, Qi Zhou<sup>2,6,\*</sup>,  
5     Yuwei Gao<sup>3,\*</sup>, Shucheng Hua<sup>1,4,\*</sup>, Yong-Guang Yang<sup>1,7,\*</sup>

6     <sup>1</sup> Key Laboratory of Organ Regeneration & Transplantation of Ministry of Education, and  
7     National-Local Joint Engineering Laboratory of Animal Models for Human Diseases,  
8     The First Hospital of Jilin University, Changchun 130062, China

9     <sup>2</sup> State Key Laboratory of Stem Cell and Reproductive Biology, Institute of Zoology,  
10     Chinese Academy of Sciences, Beijing 100101, China

11     <sup>3</sup> Changchun Veterinary Research Institute, Chinese Academy of Agricultural Sciences,  
12     Changchun 130122, China

13     <sup>4</sup> Department of Respiration, The First Hospital of Jilin University, Changchun 130061,  
14     China

15     <sup>5</sup> College of Veterinary Medicine, Hebei Agricultural University, Baoding 071001, China

16     <sup>6</sup> Institute for Stem Cell and Regeneration, Chinese Academy of Sciences, Beijing  
17     100101, China

18     <sup>7</sup> International Center of Future Science, Jilin University, Changchun 130012, China

19     <sup>8</sup> College of Veterinary Medicine, Jilin University, Changchun 130061, China

20

21     Running Head: Humanized mouse model of COVID-19

22     <sup>#</sup> These authors contributed equally to this work.

23     <sup>\*</sup> Address correspondence to: yonggg@jlu.edu.cn (Y.-G.Y.); shuchenghua@126.com

(S-C.H.); gaoyuwei@gmail.com (Y-W. G.); zhouqi@ioz.ac.cn (Q.Z.).

## ABSTRACT

There is an urgent need for animal models of COVID-19 to study immunopathogenesis and test therapeutic intervenes. In this study we showed that NSG mice engrafted with human lung (HL) tissue (NSG-L) could be infected efficiently by SARS-CoV-2, and that live virus capable of infecting Vero cells was found in the HL grafts and multiple organs from infected NSG-L mice. RNA-seq examination identified a series of differentially expressed genes, which are enriched in viral defense responses, chemotaxis, interferon stimulation, and pulmonary fibrosis between HL grafts from infected and control NSG-L mice. Furthermore, when infecting humanized mice with human immune system (HIS) and autologous HL grafts (HISL mice), the mice had bodyweight loss and hemorrhage and immune cell infiltration in HL grafts, which were not observed in immunodeficient NSG-L mice, indicating the development of anti-viral immune responses in these mice. In support of this possibility, the infected HISL mice showed bodyweight recovery and lack of detectable live virus at the later time. These results demonstrate that NSG-L and HISL mice are susceptible to SARS-CoV-2 infection, offering a useful *in vivo* model for studying SARS-CoV-2 infection and the associated immune response and immunopathology, and testing anti-SARS-CoV-2 therapies.

## Introduction

The globe pandemic of coronavirus disease 2019 (COVID-19) caused by severe acute respiratory syndrome coronavirus 2 (SARS-CoV-2) infection has affected over two hundred million people and caused more than four million deaths worldwide since the end of 2019. The lack of animal models that can be easily used to model SARS-CoV-2 infection and pathogenesis in biosafety level 3/4 facilities is an important drawback factor impeding mechanistic understanding of COVID-19 pathogenesis and test new anti-viral therapies<sup>1</sup>. Although mice are the most popular and easily handleable animal model, conventional murine models are not suitable for COVID-19 studies because most SARS-CoV-2 strains cannot use murine angiotensin I converting enzyme 2 (ACE2) to invade mouse cells<sup>2</sup>. Although human ACE2 transgenic mice have been shown susceptible to SARS-CoV-2 infection<sup>3,4</sup>, this model overlooks other proteins involved, such as transmembrane serine protease 2 (TMPRSS2) and CD147<sup>5,6</sup>. In addition, profound evolutionary divergences between mice and humans also compromise their value to faithfully replicate viral infection process and the associated disorders<sup>7</sup>. Non-human primates are genetically close to human and can be infected by SARS-CoV-2<sup>8</sup>, however, their wide usage is intensively restrained due to their extreme high cost and the need for complicated operating procedures especially in biosafety level 3/4 facilities. Thus, there is an urgent need for novel animal models that are easy to handle and faithfully mimic human SARS-CoV-2 infection and the associated immune responses.

66

67 Immune surveillance plays crucial roles in the control of viral infection and the  
68 development of inflammatory syndromes, including pneumonia and cytokine storm in  
69 COVID-19 patients<sup>9</sup>. Previous studies of ours and other groups have shown that human  
70 immune system (HIS) mice made by co-transplantation of human fetal thymic tissue  
71 (under renal capsule) and CD34<sup>+</sup> fetal liver cells (FLCs, i.v.)<sup>10,11</sup> could mount antigen  
72 specific human T and antibody responses following immunization, viral infections or  
73 transplantation<sup>12-14</sup>. Here we sought to extend this model to explore COVID-19  
74 immunopathogenesis by grafting HIS mice with human lung (HL) tissue that is  
75 autologous to the human immune system of the HIS mice. We found that the HIS mice  
76 with HL xenografts (referred to as HISL mice) could be infected by SARS-CoV-2 virus  
77 and develop anti-viral immune responses, offering a convenient and useful *in vivo* model  
78 for understanding COVID-19 pathogenesis and testing anti-SARS-CoV-2 interventions.

79

## 80 **Results**

### 81 **Entry and replication of SARS-CoV-2 and associated transcriptome changes in HL** 82 **xenografts in mice**

83 We first determined whether human HL tissue grafted in NOD/SCID IL2rg<sup>-/-</sup> (NSG) mice  
84 can be infected by SARS-CoV-2. Briefly, NSG mice were implanted subcutaneously with  
85 HL tissue (referred to as NSG-L mice), and subjected to infection via intra-HL injection  
86 of SARS-CoV-2 or PBS (as controls) 6-8 weeks later. Immunohistochemistry (IHC)

examination confirmed human ACE2 protein expression throughout the HL xenografts (Fig. 1a). Real-time qPCR (RT-qPCR) analysis revealed that SARS-CoV-2 RNA was detected in HL and various mouse tissues including heart, liver, spleen, lung, kidney, brain and intestine at days 1 and 3 following inoculation of  $10^6$  TCID<sub>50</sub> SARS-CoV-2, but not in NSG mice receiving subcutaneous injection of a similar number of virus (Fig. 1b), demonstrating SARS-CoV-2 infection and expansion in HL xenografts. To confirm this observation, another cohort of NSG-L mice were intra-HL inoculated with SARS-CoV-2 or mock. Again, viral copies were detected in HL at days 3, 5, 8, 14 and 21 after infection (Fig. 1c). Importantly, 13 out of 14 HL homogenate samples (except one at day 21) harvested from SARS-CoV-2-infected NSG-L mice at days 3, 5, 8, 14, and 21 after infection retained the capability to re-infect Vero E6 cells *in vitro*, demonstrating the existence of live SARS-CoV-2 in HL xenografts (Fig. 1d). However, viral inoculation did not lead to significant bodyweight loss (Fig. 1e) or detectable pathological changes in HL grafts (Fig. 1f) or mouse tissues (Supplementary Fig. 1), likely due to the immunodeficiency of NSG-L mice. This is in line with previous reports that the complications in COVID-19 patients are largely attributable to immune responses driven by SARS-CoV-2 infection<sup>15</sup>.

### **RNA-seq analysis for HL xenografts after SARS-CoV-2 infection**

To further understand the insight into SARS-CoV-2 infection induced changes in HL cells, we analyzed the transcriptome by RNA-seq of HL samples from uninfected NSG-L mice

108 or infected NSG-L mice 5 and 21 days after SARS-CoV-2 inoculation. For day-5 HL  
109 grafts, a total of 4612 human genes were differentially expressed between two samples,  
110 of which 2129 genes were significantly upregulated and 2483 genes were downregulated  
111 ( $|\log_2(\text{FoldChange})| > 1$  &  $\text{padj} < 0.05$ ) in SARS-CoV-2-infected compared to  
112 uninfected HL grafts (Fig. 2a left). For day-21 HL grafts, a total of 6488 human genes  
113 were differentially expressed between the two samples, of which 3311 and 3177 genes  
114 were significantly upregulated and downregulated ( $|\log_2(\text{FoldChange})| > 1$  &  $\text{padj} <$   
115  $0.05$ ), respectively in SARS-CoV-2-infected compared to uninfected HL grafts (Fig. 2a  
116 right). Many of these differentially expressed genes are associated with viral defense  
117 responses, including NLRC5, MICB, APOBEC3D, APOBEC3G, IFI6, ISG15, and  
118 IFITM3, which were markedly upregulated in infected HL grafts at days 5 and 21  
119 compared to HL grafts from uninfected NSG-L mice (Fig. 2b). Notability, HL grafts from  
120 the infected NSG-L mice showed a great upregulation of viral infection-associated  
121 chemokines (e.g., CCL11 and CXCL6 at day 5, and CCL19, CXCL19, CXCL13, CCL18  
122 at day 21; Fig. 2c) and interferon-stimulated genes (ISGs; e.g., IFIT1 and STAT1 at day 5,  
123 and ISG15, IFITM1 and IFI27 at day 21; Fig. 2d) compared to those from non-infected  
124 NSG-L mice. Furthermore, SARS-CoV-2 infection induced intensive upregulation of  
125 genes involved in pulmonary fibrosis at day 5 (e.g. CSF1, FASLG, NLRP1) and day 21  
126 (e.g. IGF2, IL18, MMP9) in infected HL grafts (Fig. 2e), providing a mechanistic  
127 explanation for the reported development of lung fibrosis, a long-term and presumably  
128 irreversible complication of COVID-19 patients<sup>16</sup>. Together, these findings support the

use of NSG-L mice as a convenient and useful *in vivo* platform for modeling human lung infection with SARS-CoV-2 and testing anti-viral therapies.

# **Development of antiviral immunity in HISL mice following SARS-CoV-2 infection**

We next examined SARS-CoV-2 infection in HISL mice with both HL and human immunity. Briefly, HISL mice were constructed by transplantation of HL and thymic tissues and CD34<sup>+</sup> cells, and subjected to SARS-CoV-2 infection after human immune reconstitution was confirmed by measuring human immune cells in peripheral blood. FACS analysis of PBMCs 14 weeks after humanization detected high levels of human CD45<sup>+</sup> lymphohematopoietic cells composed of CD3<sup>+</sup> T cells (including both CD4 and CD8 T cells), CD20<sup>+</sup> B cells and CD33<sup>+</sup> myeloid cells in HISL mice (Fig. 3a). Furthermore, human CD45<sup>+</sup> immune cells including CD4<sup>+</sup> T cells, CD20<sup>+</sup> B cells and CD11c<sup>+</sup> dendritic cells were also detected in spleen and HL grafts from these mice (Fig. 3b). These HISL mice were infected 3 weeks later with SARS-CoV-2 or mock as controls. Unlike NSG-L mice (Fig. 1), HISL mice showed a significant bodyweight loss after intra-HL SARS-CoV-2 infection, which returned to a level comparable to the control HISL mice by 21 days (Fig. 4a). No mortality was observed in HISL mice infected with SARS-CoV-2. Furthermore, HL grafts from HISL mice that received SARS-CoV-2 (but not mock) had hemorrhage at day 5, which was associated with increased infiltration by human CD45<sup>+</sup> cells, including CD4<sup>+</sup> T and CD20<sup>+</sup> B cells (Fig. 4b). Although the levels of human T and B cell infiltration in HL grafts became comparable between the two

groups at day 21, there were still significantly more human CD33<sup>+</sup> myeloid cells (Supplementary Fig. 2a), including CD11c<sup>+</sup> cells (Supplementary Fig. 2b), in HL grafts in SARS-CoV-2-infected than mock infected mice, which is in line with previous reports for patients<sup>17,18</sup>. No significant difference was detected for any human immune cell populations in WBCs, including CD3<sup>+</sup> T, CD20<sup>+</sup> B, CD33<sup>+</sup> myeloid, and CD56<sup>+</sup> NK cells between SARS-CoV-2- and mock-infected mice at day 21 (Supplementary Fig. 2c). Viral copies were detected by RT-qPCR in all HL samples (except one at day 21) from SARS-CoV-2-infected HISL mice, but not those from the control HISL mice (Fig. 4c). However, in contrast to HL homogenates from infected NSG-L mice (Fig. 1), HL homogenate samples from most infected HISL mice harvested at day 5 (5 out of 6) and day 21 (5 out of 6) failed to infect Vero E6 cells *in vitro* (Fig. 4d), indicating an efficient elimination of live SARS-CoV-2 by human immune system in these mice.

## Discussion

Mouse models are considered more convenient than non-human primates for *in vivo* studies on infectious diseases that are required to be performed in biosafety level 3/4 facilities. Lack of cross reaction between rodent ACE2 and the coronavirus protein S prevents effective invasion of SARS-CoV-2 in mice. To overcome this obstacle, mice with transgenic expression of human ACE2 were recently created and demonstrated to be susceptible to SARS-CoV-2 infection<sup>3,4</sup>. However, human ACE2-transgenic mice do not express other proteins, such as TMPRSS2 and CD147, which are potentially involved in



SARS-CoV-2 infection<sup>5,6</sup>. In this study, we explored SARS-CoV-2 infection in NSG-L and HISL mice. The NSG-L model was created by a simple procedure of HL subcutaneous implantation in NSG mice. We confirmed that the HL grafts in these mice remained lung histology and ACE2 expression and were susceptible to SARS-CoV-2 infection. Furthermore, live virus capable of infecting Vero E6 cells was detected in HL grafts and multiple organs from NSG-L mice infected with SARS-CoV-2, indicating an efficient SARS-CoV-2 replication in these mice. These results demonstrate that NSG-L mice, which can be easily constructed and comfortably used in ABSL-3 laboratories, offer an effective *in vivo* model for identifying and comparing different viral strains and testing the efficacy of anti-viral drugs including neutralizing antibodies (Fig. 5).

HISL mice were constructed by transplantation of HL and thymic tissues and CD34<sup>+</sup> cells. The HISL mice not only carried HL grafts, but also human immune system that is autologous to the HL, hence these mice developed anti-viral immune responses and complications associated with immunopathogenesis following SARS-CoV-2 infection. Although not capable of modeling upper respiratory or systemic infection/manifestations, as only the HL xenograft is susceptible to SARS-CoV-2 in these mice, this model is still useful as the only currently available model that permits *in vivo* assessment of human immune responses against SARS-CoV-2 infection. Therefore, HISL mice are a convenient and useful *in vivo* platform for evaluating the immunopathology of COVID-19 and the efficacy of anti-viral immunotherapies, such as vaccination (Fig. 5).

192

193 Respiratory viral entry and propagation in lung parenchymal cells induce native viral  
194 defense responses and associated changes in inflammatory regulating gene expression<sup>19</sup>.  
195 Dynamic transcriptome alternations in human lung parenchymal cells after SARS-CoV-2  
196 infection remain largely unknown. In this study, we found that there were large numbers  
197 of differentially expressed genes between HL grafts from SARS-CoV-2-infected and  
198 control NSG-L mice, which were enriched for anti-viral defense responses, and the  
199 associated chemokines and interferon stimulated genes. We also identified a marked  
200 upregulation of genes involved in pulmonary fibrosis, providing an explanation for lung  
201 fibrosis found in COVID-19 patients<sup>16</sup>. These data support the use of NSG-L mice as an  
202 *in vivo* model to study the kinetic changes in gene expression profiles caused by  
203 interaction between SARS-CoV-2 and human lung parenchymal cells.

204

205 Immune surveillance not only play a crucial role in viral clearance but is also involved in  
206 the immunopathogenesis and complications following viral infection. Unlike the  
207 immunodeficient NSG-L mice, SARS-CoV-2 infection in HISL mice induced significant  
208 bodyweight loss and HL tissue hemorrhage and inflammatory cell infiltration,  
209 demonstrating the development of anti-viral immune responses in these mice. The  
210 effectiveness of these anti-vital responses in HISL mice was further confirmed by the  
211 absence of live virus by 5 days and bodyweight recovery at a later time. This suggests  
212 that the clinical symptoms were caused mainly by inflammation/immune responses, but

not viral invasion directly, supporting the use of HISL mice to study COVID-19 pathogenesis and anti-SARS-CoV-2 immunotherapy.

## References

- 1 Munoz-Fontela, C. *et al.* Animal models for COVID-19. *Nature* **586**, 509-515 (2020).
- 2 Wang, Q. *et al.* Structural and functional basis of SARS-CoV-2 entry by using Human ACE2. *Cell* **181**, 894-904 e899 (2020).
- 3 Bao, L. *et al.* The pathogenicity of SARS-CoV-2 in hACE2 transgenic mice. *Nature* **583**, 830-833 (2020).
- 4 Zheng, J. *et al.* COVID-19 treatments and pathogenesis including anosmia in K18-hACE2 mice. *Nature* **589**, 603-607 (2021).
- 5 Qiao, J. *et al.* The expression of SARS-CoV-2 receptor ACE2 and CD147, and protease TMPRSS2 in human and mouse brain cells and mouse brain tissues. *Biochem Biophys Res Commun* **533**, 867-871 (2020).
- 6 Wang, K. *et al.* CD147-spike protein is a novel route for SARS-CoV-2 infection to host cells. *Signal Transduct Target Ther* **5**, 1-10 (2020).
- 7 Perrin, S. Preclinical research: Make mouse studies work. *Nature News* **507**, 423 (2014).
- 8 Blair, R. V. *et al.* Acute respiratory distress in aged, SARS-CoV-2-infected african green monkeys but not rhesus macaques. *Am J Pathol*, **191**, 274-282 (2021).

- 234 9 Sariol, A. *et al.*. Lessons for COVID-19 immunity from other coronavirus infections.  
235 *Immunity* **53**, 248-263 (2020).
- 236 10 Lan, P. *et al.* Induction of human T-cell tolerance to porcine xenoantigens through  
237 mixed hematopoietic chimerism. *Blood* **103**, 3964-3969 (2004).
- 238 11 Lan, P. *et al.* Reconstitution of a functional human immune system in  
239 immunodeficient mice through combined human fetal thymus/liver and CD34<sup>+</sup> cell  
240 transplantation. *Blood* **108**, 487-492 (2006).
- 241 12 Tonomura, N. *et al.* Antigen-specific human T-cell responses and T cell-dependent  
242 production of human antibodies in a humanized mouse model. *Blood* **111**, 4293-4296  
243 (2008).
- 244 13 Tonomura, N. *et al.* Pig islet xenograft rejection in a mouse model with an  
245 established human immune system. *Xenotransplantation* **15**, 129-135 (2008).
- 246 14 Brainard, D. M. *et al.* Induction of robust cellular and humoral virus-specific  
247 adaptive immune responses in human immunodeficiency virus-infected humanized  
248 BLT mice. *J Virol* **83**, 7305-7321 (2009).
- 249 15 Vardhana, S. A. *et al.* The many faces of the anti-COVID immune response. *J Exp*  
250 *Med* **217**, 6 (2020).
- 251 16 Grillo, F. *et al.* Lung fibrosis: an undervalued finding in COVID-19 pathological  
252 series. *Lancet Infect Dis* **21**, e72 (2020).
- 253 17 Szabo, P. A. *et al.* Longitudinal profiling of respiratory and systemic immune  
254 responses reveals myeloid cell-driven lung inflammation in severe COVID-19.

*Immunity* **54**, 4 (2021).

18 Nienhold, R. *et al.* Two distinct immunopathological profiles in autopsy lungs of

COVID-19. *Nature Communications* **11**, 1-13 (2020).

19 Vabret, N. *et al.* Immunology of COVID-19: Current State of the Science. *Immunity*

**52**, 910-941 (2020).

## Methods

**Mice and human tissues.** NOD-Prkd<sup>cem26Cd52</sup>Il2rg<sup>em26Cd22</sup>/Nju (referred to as NSG) mice

were purchased from Nanjing Biomedical Research Institute of Nanjing University. All

mice were housed in a specific pathogen-free (SPF) microisolator environment and used

between 6-8 weeks of age. Discard human fetal samples of gestational age of 17-21

weeks were obtained with informed consent at the First Hospital of Jilin University.

Human fetal thymic and lung tissues were cut into small pieces with a diameter of around

1 mm or 5 mm, respectively, and CD34<sup>+</sup> cells were purified from fetal liver cells (FLCs)

by magnetic-activated cell sorting (MACS; with a purity of >90% confirmed by FACS).

The human tissues and cells were cryopreserved in liquid nitrogen until use. Protocols

involved in the use of human samples and animals were reviewed and approved by the

Institutional Review Board and Institutional Animal Care and Use Committee of the First

Hospital of Jilin University, and all experiments with SARS-CoV-2 (COVID-19) were

performed in biosecurity level 3 laboratory according to the protocols approved by the

Changchun Veterinary Research Institute, Chinese Academy of Agricultural Sciences.

**NSG-L mouse and HISL humanized mouse model construction.** NSG-L mice were

made by subcutaneous implantation of human fetal lung tissue (approximately 5 mm in diameter). HISL humanized mice were made by implantation of human fetal thymic tissue (around 1 mm in diameter; under the renal capsule) and lung tissue (5 mm in diameter; subcutaneously) in NSG mice that pre-conditioned with 1.75 Gy total body irradiation (TBI; Rad Source RS2000), followed by intravenous injection of  $1-2 \times 10^5$  human CD34<sup>+</sup> FLCs (given 6-8 hours after TBI).

**Flow cytometric analysis.** Mouse PBMCs were prepared using density gradient centrifugation with Histopaque 1077 (Sigma-Aldrich, St. Louis, MO). Human immune cell reconstitution in humanized mice were determined by flow cytometry using following fluorochrome-conjugated antibodies: anti-human CD45, CD3, CD20, CD33, CD4, CD8; anti-mouse CD45 and Ter119 (BD Pharmingen). Examination was performed on a Cytex Aurora (Cytex Biosciences) and data were analyzed using the FlowJo software. Dead cells were excluded from the analysis by gating out propidium iodide retaining cells.

**SARS-CoV-2 virus preparation and titer determination.** SARS-CoV-2 (BetaCoV/Beijing/IME-BJ05-2020) was proliferated in Vero E6 cells, which are maintained in Dulbecco's modified Eagle's medium (DMEM; Invitrogen, Carlsbad, CA, USA) with supplemented 2% fetal bovine serum (FBS; Gibco, Auckland, New Zealand). Viral titers were determined using a standard 50% tissue culture infection dose (TCID<sub>50</sub>) assay.

**Mouse experiments.** NSG-L or HISL mice were anesthetized with isoflurane and injected with 100 µl of  $10^6$  TCID<sub>50</sub> of SARS-CoV-2 or PBS into the human lung (HL)

graft. The mice were followed for bodyweight changes, and euthanized for measuring viral particles and histological changes in HL grafts and tissues at indicated time points.

**RNA extraction and RT-qPCR.** Total RNA was extracted from tissues homogenates using the RNeasy Mini Kit (Qiagen, Hilden, Germany), and viral RNA loads were determined by a SARS-CoV-2 RNA detection kit (Shenzhen Puruikang Biotech, China). The viral RNA loads for the target SARS-CoV-2 N gene was normalized to the standard curve obtained by using a plasmid containing the full-length cDNA of the SARS-CoV-2 N gene. The reactions were performed with CFX96 system (BIO-RAD, America) according to the following protocol: 50 °C for 20 min for reverse transcription, followed by 95 °C for 3 min and then 45 cycles of 95 °C for 5 s, 56 °C for 45 s. Results were presented as log10 numbers of genome equivalent copies per gram of sample.

**Histology.** Tissues were embedded in paraffin, and sectioned (2.5 µm) for H&E and immunohistochemistry (IHC) examination. For IHC, tissue sections were firstly stained with monoclonal anti-human CD45 (DAKO, 2B11+PD7/26), CD20 (DAKO, L26), CD4 (ABclonal; ARC0328), or CD11c (Abcam; EP1347Y), ACE2 (Abcam; EPR4435(2)) antibodies, and the immunoreactivity was detected with UltraSensitive™ Streptavidin-Peroxidase Kit (KIT-9710, Mai Xin, China) according to the manufacturer's protocol.

**RNA-seq.** Total RNA was polyA-selected, fragmented and the samples were examined on an Illumina Novaseq6000 machine, yielding an average of 22 million uniquely aligned

paired-end 150-mer reads per sample. Reads were aligned with STAR RNA-seq aligner (Version 2.7.3a) using the UCSC/hg38 genome assembly and transcript annotation<sup>20</sup>. Expression levels were calculated as Fragments per Kilobase of transcript per Million reads (FPKM) using Cufflinks software<sup>21</sup>. Differential expression analysis was performed using Cuffdiff (version 2.2.1.Linux\_x86\_64)<sup>21</sup>. In each analysis, genes with thresholds of  $|\log_2(\text{foldchange})| > 1$ ,  $p_{adj} < 0.05$  and a mean FPKM value of more than 5 were tested. “Cluster Profiler” package (Release 3.16.1)<sup>22</sup> and “DOSE” package (Release 3.14.0)<sup>23</sup> in R software (version 4.0.2) was used for functional enrichment analysis, and GO biological processes terms at the significant level ( $q\text{-value} < 0.05$ ) were employed.

**Statistical analysis.** Data were analyzed using GraphPad Prism 8 software (San Diego, CA, USA) and presented as mean values  $\pm$  SEM. The results were compared statistically using unpaired two-tailed Student’s t test and two-way analysis of variance (ANOVA), and a p value of  $\leq 0.05$  was considered significant.

### **Data availability**

RNA-seq data have been deposited into the National Center for Biotechnology Information (NCBI) Gene Expression Omnibus (GEO) database under accession numbers GSE175900. The datasets generated during and/or analyzed during the current study are available from the corresponding author on reasonable request.

### **References**

- 20 Dobin, A. *et al.* STAR: ultrafast universal RNA-seq aligner. *Bioinformatics* **29**, 15-21 (2013).



21 Trapnell, C. *et al.* Transcript assembly and quantification by RNA-Seq reveals  
unannotated transcripts and isoform switching during cell differentiation. *Nat*  
*Biotechnol* **28**, 511-515 (2010).

22 Yu, G. *et al.* clusterProfiler: an R package for comparing biological themes among  
gene clusters. *OMICS* **16**, 284-287 (2012).

23 Yu, G. *et al.* DOSE: an R/Bioconductor package for disease ontology semantic and  
enrichment analysis. *Bioinformatics* **31**, 608-609 (2015).

## Acknowledgements

This work was supported by grants from the Strategic Priority Research Program of the  
Chinese Academy of Sciences (XDA16030303), Chinese MOST (2017YFA0104402) and  
NSFC (91742107, 81870091, 91642208, 82001697 and 81941008), Science development  
project of Jilin province (20190201295JC and 20200703012ZP), and special grants for  
COVID-19 research of Jilin province (20200901006SF).

## Author contributions

Z.H., Q.Z., Y-W. G., S-C.H, Y-G.Y. conceived the study; Z.H., R-R.S., Z-Z.Z.,Y-X.W.,  
C.S., J.H. performed the experiments; C.F. contributed to RNA-seq data analysis; Z.H.,  
Q.Z., Y-W.G.,S-C.H. supervised the work; W.L. contributed to the discussion of the  
results; Z.H., R-R.S., Z-Z.Z., C.F. Y-G.Y. analyzed the data and wrote the manuscript; all  
authors edited and approved the manuscript..

363     **Competing interests**

364     The authors declare that they have no competing financial interests.

365

## Figure legends

**Fig.1 SARS-CoV-2 infection of HL xenografts in NSG mice.** NSG-L mice were subjected to SARS-CoV-2 infection ( $10^6$  TCID<sub>50</sub> given by intra-HL injection) 6-8 weeks after HL transplantation. Data from two independent experiments are presented, in which NSG mice receiving subcutaneous injection of SARS-CoV-2 (**b**) or NSG-L mice receiving intra-HL injection of PBS (**c-f**) were used as controls, respectively. **a**, Representative IHC images of HL xenografts (up, isotype; down, human ACE2). **b**, Viral copies in the indicated tissues examined by RT-qPCR 1 (n=2 and 1 for HL-infected and control groups, respectively) or 3 (n=1 per group) days after infection. **c-f**, Viral RNA copies examined by RT-qPCR (**c**) and titers measured by Vero E6 cells (**d**) in HL xenografts, and bodyweight changes (**e**) at the indicated time points (n=3 per group); **f**, Representative H&E images of HL xenografts at day 5 after intra-HL injection of PBS (left) or SARS-CoV-2 (right).

## **Fig.2 RNA-seq analysis for HL grafts from NSG-L mice after SARS-CoV-2 infection.**

HL grafts injected with  $10^6$  TCID<sub>50</sub> SARS-CoV-2 virus were harvested from NSG-L mice for RNA-seq examination at day 5 and 21 after infection; Naïve HL graft without infection was used as control. **a**, Volcano plot showing DEGs of HL grafts for SARS-CoV2-infected at day 5 (left) or day 21 (right) and non-infection control from NSG-L mice. The data for all genes are plotted as log<sub>2</sub> fold change versus the  $-\log_{10}$  of the adjusted p-value. **b-e**, Heatmaps of RNA-seq expression Z-scores computed for

selected genes that are differentially expressed ( $p_{adj} < 0.05$ ,  $|\log_2(\text{foldchange})| > 1$ ) between 3 pairwise comparisons (L\_E5 vs L\_E21, Lung vs L\_E5, Lung vs L\_E21). **b**, DEGs under GO term “defense response to virus” (BP GO: 0051607); **c**, Chemokines; **d**, Interferon-stimulated genes; **e**, DEGs under DO term “Pulmonary Fibrosis” (DOID:3770).

**Fig.3 Human immune reconstruction in HISL mice.** HISL mice were made by co-transplantation of human fetal lung tissue (subcutaneous) together with autologous human fetal thymic tissue (under renal capsule) and CD34<sup>+</sup> FLCs in NSG mice and used for examination. **a**, Human immune cell chimerism in PBMCs of HISL mice at week 14. **b**, IHC images of spleen (up) and HL (down) sections of HISL mice stained for human CD45, CD4, CD20, and CD11c.

**Fig.4 HISL mice are susceptible for SARS-CoV-2.** HISL mice were infected at week 17 post-humanization with mock or  $10^6$  TCID<sub>50</sub> SARS-CoV-2 into HL. **a**, Bodyweight changes of HISL mice infected with SARS-CoV-2 (n=6) or mock (n=4). **b**, Representative H&E and IHC images of HL sections of HISL mice infected with SARS-CoV-2 (n=6) or mock (n=4) at day 5. **c-d**, Mice were euthanized at days 2, 5, and 21 post-infection, and SARS-CoV-2 viral copies (**c**) and viral titers (**d**) in HL were examined (each symbol represents an individual animal). \* $P < 0.05$ .

408 **Fig.5 Schema of NSG-L and HISL mice and their potential use in COVID-19**  
409 **studies.**

**a**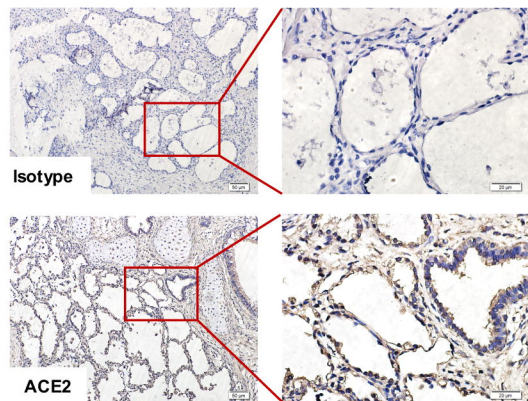**b**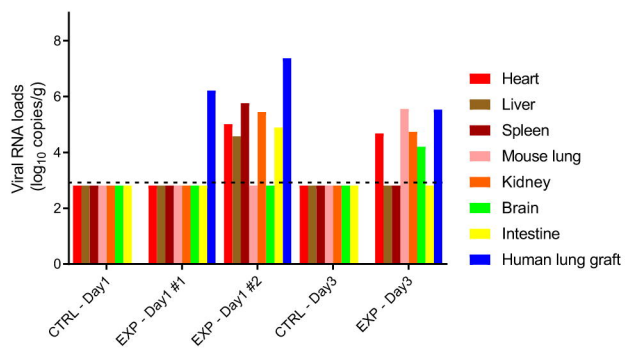**c**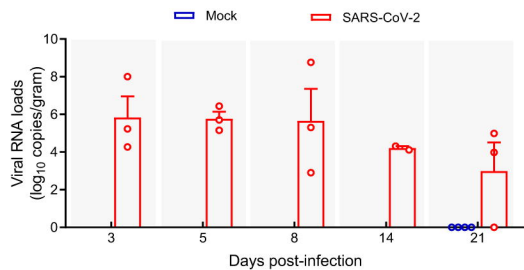**d**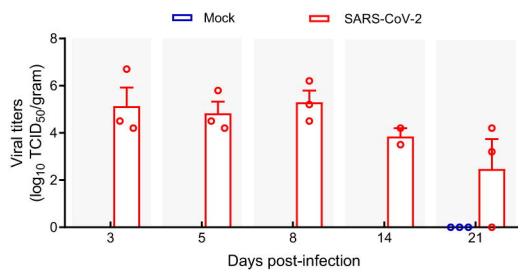**e**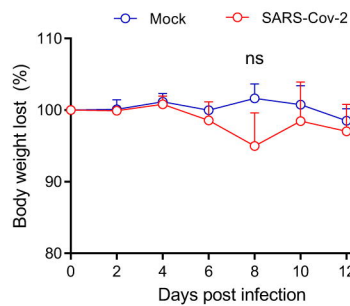**f**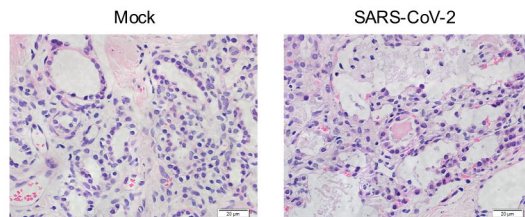

**a**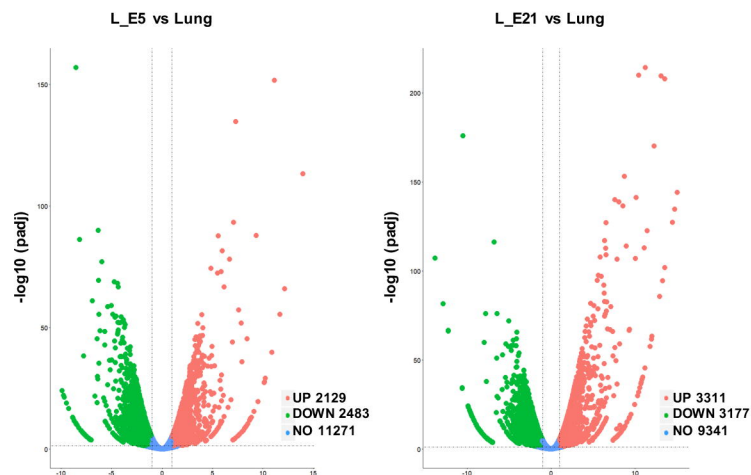**b**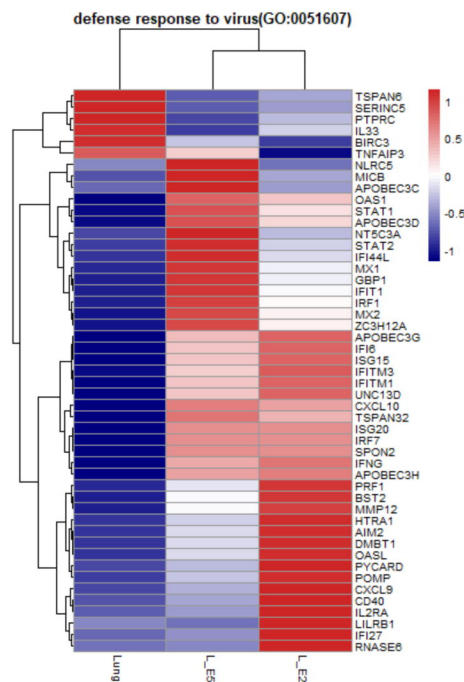**c**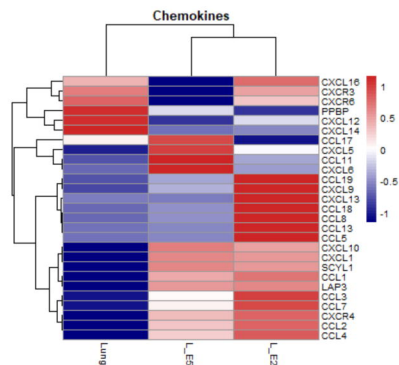**d**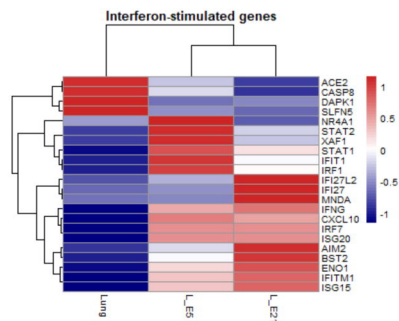**e**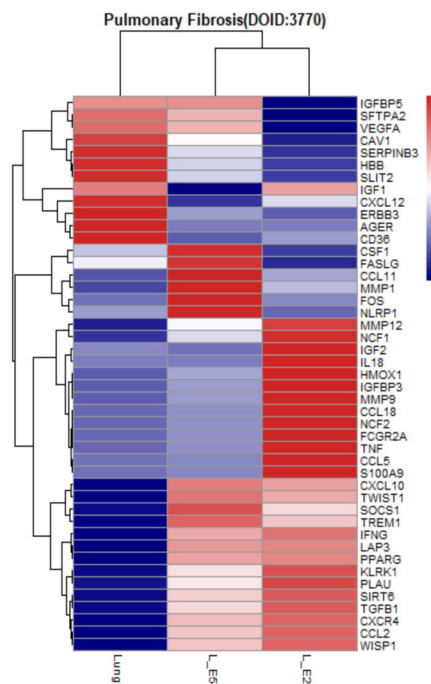

**a**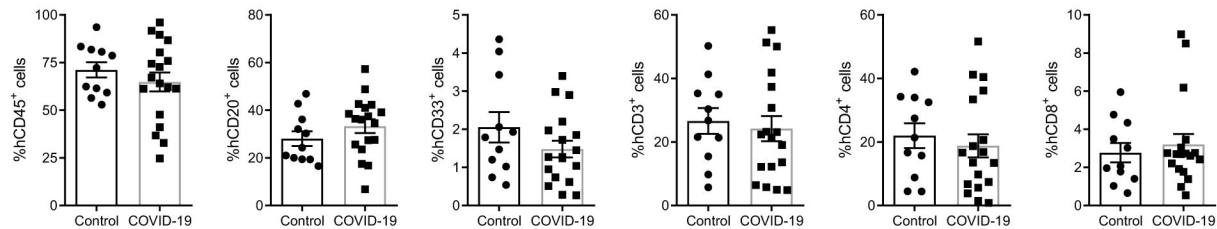**b**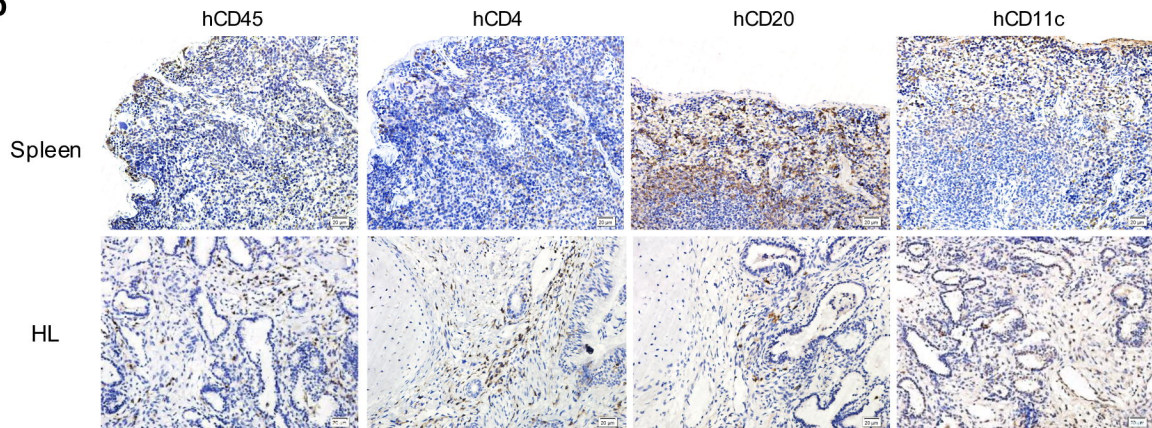



**a**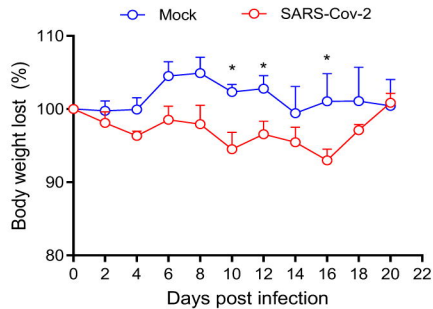**b**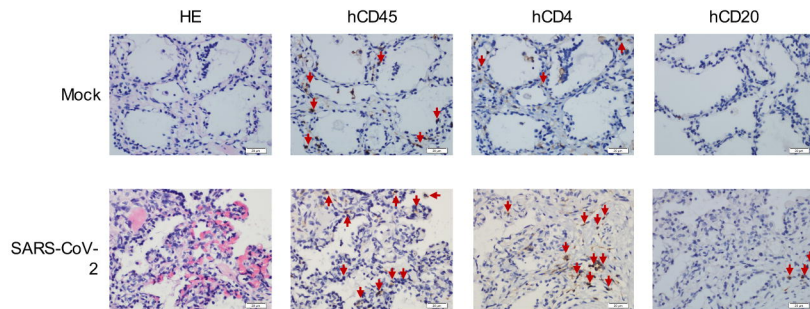**c**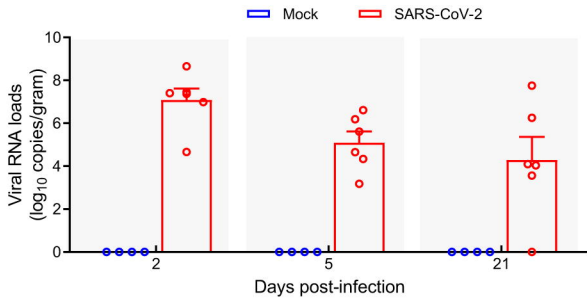**d**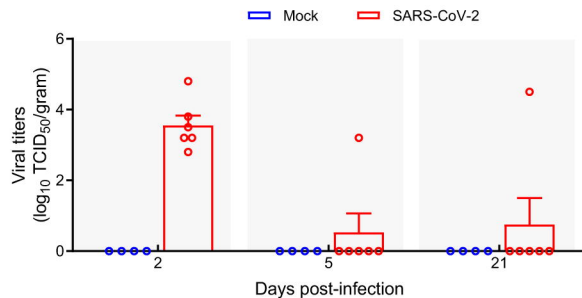

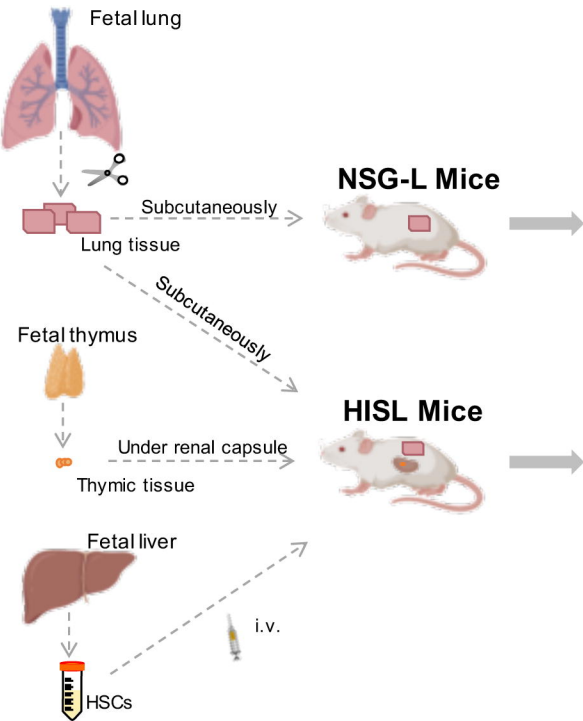

- Easily to prepare and use in ABSL-3 laboratories.
- Effective in identifying and comparing different viral strains and testing anti-viral drugs (e.g., neutralizing antibodies).

- Bearing both HL and human immune system, developing anti-SARS-CoV-2 immune responses.
- Permitting in vivo studies of human immune responses against SARS-CoV-2 infection
- A useful model for evaluating COVID-19 immunopathology and testing anti-viral immunotherapies (e.g., vaccines).
